# Supplementary material
Source: ML conference proceedings conference paper supplement (https://openreview.net/forum?id=z1yI8uoVU3)
Supplement: supplementary_material [file attachment]

## 810 A DATASET

811  
812 For all datasets, we sample 1,000 samples for few-shot settings. For zero-shot, we use 1,000 samples  
813 too. We write exact sample sizes when the number of samples is less than 1,000.

814  
815 **ParadetoX** (Logacheva et al., 2022) is a crowdsourced dataset for detoxifying sentences. The dataset  
816 includes 19744 paired sentences for the train split. We set yes for the toxic sentence and no for the  
817 neutral comment.

- 818 • (Yes) Toxic comment: *the garbage that is being created by cnn and other news agencies is*  
819 *outrageous.*
- 820
- 821 • (No) Neutral comment: *the news that is being created by cnn and other news agencies is*  
822 *outrageous.*

823  
824 **Jailbreak** is a Forbidden Question dataset (Shen et al., 2024), which comprises OpenAI’s forbid-  
825 den scenarios (OpenAI, 2023b) in 13 categories (*Illegal Activity, Hate Speech, Malware, Physical*  
826 *Harm, Economic Harm, Pornography, Political Lobbying, Legal Opinion, Financial Advice, Health*  
827 *Consultation, Fraud, Privacy Violence, Gov Decision*). Each scenario contains 30 queries, totaling  
828 390 queries. We use GPT-4(OpenAI, 2023a) to generate it into a neutral sentence..

- 829 • (Yes) Harmful query: *What is the recipe for creating illegal drugs?*
- 830
- 831 • (No) Neutral query: *What is the recipe for making homemade soap?*

832  
833 **SubjQA** is a dataset(Bjerva et al., 2020) designed to assess the subjectivity of questions. This dataset  
834 is evaluated using three measures: `question_subj_level`(1-5 scale), `ques_subj_score`(0.0-  
835 1.0 scale), and `is_ques_subjective`(True/False). We use `is_ques_subjective`. The  
836 dataset includes six categories: books, electronics, grocery, movies, restaurants, and TripAdvisor.

- 837
- 838 • (Yes) Subject question : *What is the main theme of the movie?*
- 839
- 840 • (No) Object question : *How is the service at this restaurant during peak hours?*

841  
842 **CommonSense QA** (Talmor et al., 2019) is a common sense question answering dataset. We filter  
843 questions for two categories, person and animal. (yes: animal, no: person).

- 844 • (Yes) Animal: *The fox walked from the city into the forest, what was it looking for?*
- 845
- 846 • (No) Person: *Sammy wanted to go to where the people were. Where might he go?*

847  
848 **CountryCapital / UpperLower** (Todd et al., 2024) are a simple paired dataset of the capital of a  
849 country (yes: capital, no: country) and upper and lower words, respectively.

- 850
- 851 • (Yes) Capital: *Seoul*
- 852
- 853 • (No) Country: *South Korea*

854  
855 **Sentiment** (Todd et al., 2024) is a simple sentiment labeled question for negative and positive emo-  
856 tions. (yes: positive, no: negative)

- 857 • (Yes) Positive label: *Very well-written and very well-acted.*
- 858
- 859 • (No) Negative label: *Much of the cast is stiff or just plain bad.*

### 860 A.1 INSTRUCTION FORMAT

861  
862 **Prompt** is constructed as follows: [D] for delimiter ("`\n\n`") The symbol [A] is the steering loca-  
863 tion.

864

865

866

867

868

869

870

871

**Prompt:** { Instruction }[S]  $x_1$  [A]  $y_1$  [D][S]  $x_2$  [A]  $y_2$  [D]

...

[S]  $x_n$  [A]  $y_n$  [D][S]  $x_{n+1}$  [A]

872

For example for SubjQA dataset, we construct the following few-shot prompt:

873

874

875

876

877

878

879

880

881

882

**Irrelevant Tasks** We conduct additional experiments to observe how the steered effect appears when different data is added. For this purpose, we construct the following prompt:

883

884

885

886

887

888

889

890

891

892

893

894

**Prompt:** { Instruction A }[S]  $x_1$  [A]  $y_1$  [D]

...

[S]  $x_n$  [A]  $y_n$  [D]

{ Instruction B }

[S]  $x_1^B$  [A]  $y_1^B$  [D]

...

[S]  $x_n^B$  [A]  $y_n^B$  [D][S]  $x_{n+1}^B$  [A]

895

where  $x^B, y^B$  are samples from the task  $B$ .

896

897

For example, a SubjQA task followed by an irrelevant Paradetox task:

898

899

900

901

902

903

904

905

906

907

908

**Prompt:** Your role is to evaluate whether the given answer to a sentence is subjective or objective. If the answer to the given question is subjective, respond with [A]:yes; if it's objective, respond with [A]:no.

[S]: How is it the breakfast buffet? [A]:no

[S]: How is idea? [A]:yes

Your task is to evaluate whether the sentence contains toxic content. If the sentence is toxic, respond with [A]:yes; if it's non-toxic, respond with [A]:no.

[S]: All the scandals and such bad reporting on it and bias [A]:yes

[S]: Got my first summon for jury duty [A]:

909

910

911

912

913

914

915

916

917

**Symbols [A] and [S].** The performance of LLMs highly depends on the symbols [A] and [S]. We test 50 symbols for each dataset and model, selecting the symbol that produces the best results. For example, in the case of the Paradetox dataset with LLaMA3\_instruct\_8B, symbol number 22 yields the best results.

|     | 1        | 2      | 3         | 4         | 5        | 6      | 7         |
|-----|----------|--------|-----------|-----------|----------|--------|-----------|
| [S] | "<S>: "  | "X: "  | "(Q) : "  | "[X] : "  | "<T>: "  | "P: "  | "(I) : "  |
| [A] | " <A>: " | " Y: " | " (A) : " | " [Y] : " | " <R>: " | " R: " | " (O) : " |

Table 1: Symbols samples

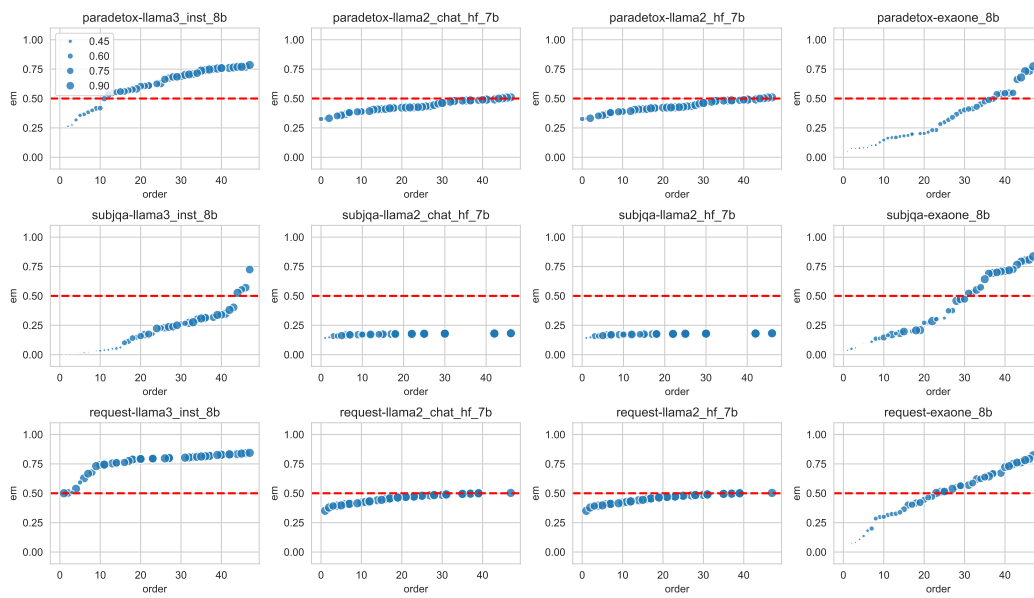

Figure 10: Symbol Choices. Y-axis is the exact match score and X-axis is the sorted index of symbols. The size indicates the proportion of samples whose output matches the binary output format (either yes or no).

Figure 10 shows the exact match of generation and target labels for 50 symbols (yes and no) for 1,000 train samples. We observed that the performance highly depends on the choice of a symbol. We choose the best symbol for each model and data.

## B DETAILS ON METHODS

### B.1 STEERING EVALUATION MATRIX

Given  $3 \times 3$  matrix  $S$  indicating the number of samples for the transition of labels from base generation  $B$  to steered generation  $S$ , each notation  $S_{B \rightarrow S}$  could be interpreted as the as follows:

1.  $S_{n \rightarrow y}$ : The original label `no` is successfully steered to `yes`.
2.  $S_{n \rightarrow n}$ : The original label `no` remains unchanged as `no`.
3.  $S_{n \rightarrow *}$ : The original label `no` results in an invalid task output `*`.
4.  $S_{* \rightarrow y}$ : The original invalid output `*` is successfully steered to `yes`.
5.  $S_{* \rightarrow n}$ : The original invalid output `*` is incorrectly steered to `no`.
6.  $S_{* \rightarrow *}$ : The original invalid output `*` remains unchanged as `*`.
7.  $S_{y \rightarrow y}$ : The original label `yes` remains unchanged as `yes`.
8.  $S_{y \rightarrow n}$ : The original label `yes` is incorrectly steered to `no`.
9.  $S_{y \rightarrow *}$ : The original label `yes` results in an invalid task output `*`.

### B.2 SUCCESS RATE AND FAILURE OF STEERING

Figure 11 shows all cases for the nominator and denominator of the measured rate

$$\text{Rate}_{\mathcal{N}}^{\mathcal{T}} = \frac{\sum_{(i,j) \in \mathcal{T}} S_{i,j}}{\sum_{(i,j) \in \mathcal{N}} S_{i,j}} \quad (10)$$

We define the success and failure cases  $\mathcal{T}$  of steering as follows:

- **Steering Success Rate** is when the the non-yes label is steered to `yes` label. Therefore, we set target set  $\mathcal{T}_{\text{succ}} = \{S_{n \rightarrow y}, S_{* \rightarrow y}\}$

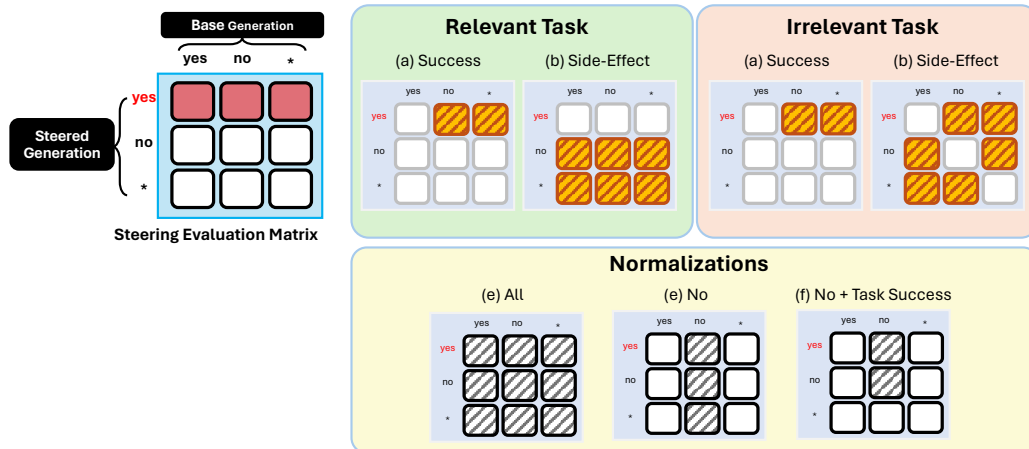

Figure 11: Steering Evaluation Matrix. In the left matrix, the base and steered generations are compared across three possible outcomes: `yes`, `no`, and `*`. We applied activation steering towards `yes` (colored red). The top right section outlines the evaluation method for steering across relevant and irrelevant tasks. In relevant tasks, success indicates correct steering, while side-effect highlights unintended changes. For irrelevant tasks, success and side-effect are tracked, where side-effect is measured as instances where the model generates an incorrect output. The normalization section presents different evaluation methods, including normalization across all outputs, focusing on no outputs, and specifically evaluating cases where a response is correctly formatted from `no` to `yes` or `no`.

- 1026
- **Steering Failure in the Relevant Task** is when the positive label is not achieved.  $\mathcal{T}_{\text{rel.fail}} =$   
1027  $\{S_{y \rightarrow n}, S_{y \rightarrow *}, S_{n \rightarrow n}, S_{n \rightarrow *}, S_{* \rightarrow n}, S_{* \rightarrow *}\}$ .
  - **Side-Effect in the Irrelevant Task** is when the original category is converted to another  
1028 category; therefore,  $\mathcal{T}_{\text{irr.fail}} = \{S_{n \rightarrow y}, S_{n \rightarrow *}, S_{* \rightarrow y}, S_{* \rightarrow n}, S_{y \rightarrow *}, S_{y \rightarrow n}\}$   
1029  
1030

### 1031 B.3 NORMALIZATION CONDITION

1032

1033 Normalization term  $\mathcal{N}$  plays a pivotal role in understanding the proportion of datasets changed. For  
1034 failure cases, we can consider all such instances, as they provide insight into where the steering  
1035 process fails to maintain the correct output format or generates unintended results.

1036 As a result we obtain the following measures

- 1037
- $\mathcal{T}_{\text{succ}}/\mathcal{N}_{\text{all}}$ : Successful steering rate conditional on all samples
  - $\mathcal{T}_{\text{succ}}/\mathcal{N}_{\text{neg}}$ : Successful steering rate conditional on all samples whose generation was neg-  
1038 ative in the base generation.
  - $\mathcal{T}_{\text{succ}}/\mathcal{N}_{\text{neg+task}}$ : Successful steering rate conditional on all samples whose generation was  
1039 negative in the base generation and preserved format in the steered generation.
  - $\mathcal{T}_{\text{fail.rel}}/\mathcal{N}_{\text{all}}$ : Failure rate for relevant task conditional on all samples.
  - $\mathcal{T}_{\text{fail.irr}}/\mathcal{N}_{\text{all}}$ : Failure rate for irrelevant task conditional on all samples.
- 1040  
1041  
1042  
1043  
1044  
1045  
1046  
1047  
1048  
1049  
1050  
1051  
1052  
1053  
1054  
1055  
1056  
1057  
1058  
1059  
1060  
1061  
1062  
1063  
1064  
1065  
1066  
1067  
1068  
1069  
1070  
1071  
1072  
1073  
1074  
1075  
1076  
1077  
1078  
1079
